# Supplementary material for: Relationship between exposure to PM2.5 and lung cancer incidence and mortality: A meta-analysis
Source: PubMed Central journal article supplement (PMC5522148; doi:10.18632/oncotarget.17313), 2017-04-21
Supplement: oncotarget-08-43322-s001.pdf [file oncotarget-08-43322-s001.pdf]

## Relationship between exposure to PM2.5 and lung cancer incidence and mortality: A meta-analysis

### SUPPLEMENTARY TABLES

Supplementary Table 1: Newcastle-ottawa quality assessment scale for cohort studies in the meta-analysis

| NEWCASTLE - OTTAWA QUALITY ASSESSMENT SCALE COHORT STUDIES |                                          |                                     |                           |                                                                          |                                                                 |                       |                                                 |                                  |             |
|------------------------------------------------------------|------------------------------------------|-------------------------------------|---------------------------|--------------------------------------------------------------------------|-----------------------------------------------------------------|-----------------------|-------------------------------------------------|----------------------------------|-------------|
| Study                                                      | Selection                                |                                     |                           | Comparability                                                            |                                                                 |                       | Outcome                                         |                                  | Total score |
|                                                            | Representativeness of the exposed cohort | Selection Of the Non-exposed cohort | Ascertainment of exposure | Demonstration that outcome of interest was not present at start of study | Comparability of cohorts on the basis of the design or analysis | Assessment of outcome | Was follow-up long enough for outcomes to occur | Adequacy of follow up of cohorts |             |
| McDonnell et al.2000                                       | 1                                        | 1                                   | 1                         | 0                                                                        | 2                                                               | 1                     | 1                                               | 1                                | 8           |
| Pope et al.2011                                            | 1                                        | 1                                   | 1                         | 0                                                                        | 1                                                               | 1                     | 0                                               | 0                                | 5           |
| Hart et al. 2011                                           | 0                                        | 1                                   | 1                         | 0                                                                        | 2                                                               | 1                     | 0                                               | 0                                | 5           |
| Lipsett et al. 2011                                        | 0                                        | 1                                   | 1                         | 0                                                                        | 2                                                               | 1                     | 0                                               | 0                                | 5           |
| Lepeule et al. 2012                                        | 1                                        | 1                                   | 1                         | 0                                                                        | 1                                                               | 1                     | 1                                               | 1                                | 7           |
| Puett et al. 2014                                          | 0                                        | 1                                   | 1                         | 0                                                                        | 2                                                               | 1                     | 1                                               | 1                                | 7           |
| Hart et al.2015                                            | 1                                        | 1                                   | 1                         | 1                                                                        | 2                                                               | 1                     | 0                                               | 0                                | 7           |
| Weichenthal et al.2016                                     | 1                                        | 1                                   | 1                         | 0                                                                        | 1                                                               | 1                     | 0                                               | 0                                | 5           |
| Beelen et al. 2008                                         | 1                                        | 1                                   | 1                         | 0                                                                        | 2                                                               | 1                     | 0                                               | 0                                | 6           |
| Carey et al. 2013                                          | 1                                        | 1                                   | 1                         | 0                                                                        | 2                                                               | 1                     | 0                                               | 0                                | 6           |
| Cesaroni et al. 2013                                       | 1                                        | 1                                   | 1                         | 0                                                                        | 2                                                               | 1                     | 0                                               | 0                                | 6           |
| Raaschou-Neilsen et al. 2013                               | 1                                        | 1                                   | 1                         | 0                                                                        | 2                                                               | 1                     | 0                                               | 0                                | 6           |
| Cao et al. 2011                                            | 1                                        | 1                                   | 1                         | 0                                                                        | 2                                                               | 1                     | 1                                               | 1                                | 8           |
| Katanoda et al. 2011                                       | 1                                        | 1                                   | 1                         | 0                                                                        | 2                                                               | 1                     | 1                                               | 1                                | 8           |
| Yorifuji et al. 2015                                       | 1                                        | 1                                   | 1                         | 0                                                                        | 1                                                               | 1                     | 0                                               | 0                                | 5           |
| Guo et al.2016                                             | 1                                        | 1                                   | 1                         | 0                                                                        | 1                                                               | 1                     | 0                                               | 0                                | 5           |

Supplementary Table 2: Newcastle-ottawa quality assessment scale for case-control study in the meta-analysis

| NEWCASTLE - OTTAWA QUALITY ASSESSMENT SCALE CASE CONTROL STUDIES |                                 |                                 |                       |                        |                                                                            |                           |                                                     |                   |             |
|------------------------------------------------------------------|---------------------------------|---------------------------------|-----------------------|------------------------|----------------------------------------------------------------------------|---------------------------|-----------------------------------------------------|-------------------|-------------|
| Study                                                            | Is the case definition adequate | Representativeness Of the cases | Selection             |                        | Comparability                                                              |                           | Exposure                                            |                   | Total score |
|                                                                  |                                 |                                 | Selection of Controls | Definition of Controls | Comparability of cases and controls on the basis of the design or analysis | Ascertainment of exposure | Same method of ascertainment for cases and controls | Non-Response rate |             |
| Hystad et al. 2013                                               | 1                               | 1                               | 1                     | 1                      | 2                                                                          | 1                         | 1                                                   | 0                 | 8           |
